# Supplementary material for: Health Literacy and Environmental Risks Focusing Air Pollution: Results from a Cross-Sectional Study in Germany
Source: MDPI journal article supplement (doi:10.3390/ijerph21030366), 2024-03-19
Supplement: s1 [file s1]

# Questionnaire

## SOCIODEMOGRAPHIE

What is your sex?

- ☐ Female
- ☐ Male
- ☐ Divers
  
- ☐ No answer

What is your age?

\_\_\_\_ years

- ☐ No answer

What is your highest educational level?

- ☐ No degree
- ☐ Pupil
- ☐ Certificate of Secondary Education
- ☐ General Certificate of Secondary Education
- ☐ University entrance exam
- ☐ University degree (bachelor, master, diploma)
- ☐ Doctoral degree
- ☐ Other
  
- ☐ No answer

## HEALTH LITERACY

On a scale from very easy to very difficult, how easy would you say it is to....

... find information on treatments of illness that concern you?

- ☐ Very easy
- ☐ Fairly easy
- ☐ Fairly difficult
- ☐ Very difficult
  
- ☐ No answer

... find out where to get professional help when you are ill?

- ☐ Very easy
- ☐ Fairly easy
- ☐ Fairly difficult
- ☐ Very difficult
  
- ☐ No answer

... understand what your doctor says to you?

- ☐ Very easy
- ☐ Fairly easy
- ☐ Fairly difficult
- ☐ Very difficult
  
- ☐ No answer

... understand your doctor's or pharmacist's instruction on how to take a prescribed medicine?

- ☐ Very easy
- ☐ Fairly easy
- ☐ Fairly difficult
- ☐ Very difficult
  
- ☐ No answer

|                                                                                                                                                      |                                                                                                                                                                                                                                                               |
|------------------------------------------------------------------------------------------------------------------------------------------------------|---------------------------------------------------------------------------------------------------------------------------------------------------------------------------------------------------------------------------------------------------------------|
| <b>... judge when you may need to get a second opinion from another doctor?</b>                                                                      | <ul style="list-style-type: none"><li><input type="radio"/> Very easy</li><li><input type="radio"/> Fairly easy</li><li><input type="radio"/> Fairly difficult</li><li><input type="radio"/> Very difficult</li><li><input type="radio"/> No answer</li></ul> |
| <b>... use information the doctor gives you to make decisions about your illness?</b>                                                                | <ul style="list-style-type: none"><li><input type="radio"/> Very easy</li><li><input type="radio"/> Fairly easy</li><li><input type="radio"/> Fairly difficult</li><li><input type="radio"/> Very difficult</li><li><input type="radio"/> No answer</li></ul> |
| <b>... follow the instructions from your doctor or pharmacist?</b>                                                                                   | <ul style="list-style-type: none"><li><input type="radio"/> Very easy</li><li><input type="radio"/> Fairly easy</li><li><input type="radio"/> Fairly difficult</li><li><input type="radio"/> Very difficult</li><li><input type="radio"/> No answer</li></ul> |
| <b>... find information on how to manage mental health problems like stress or depression?</b>                                                       | <ul style="list-style-type: none"><li><input type="radio"/> Very easy</li><li><input type="radio"/> Fairly easy</li><li><input type="radio"/> Fairly difficult</li><li><input type="radio"/> Very difficult</li><li><input type="radio"/> No answer</li></ul> |
| <b>... understand health warnings about behavior such as smoking, low physical activity and drinking too much?</b>                                   | <ul style="list-style-type: none"><li><input type="radio"/> Very easy</li><li><input type="radio"/> Fairly easy</li><li><input type="radio"/> Fairly difficult</li><li><input type="radio"/> Very difficult</li><li><input type="radio"/> No answer</li></ul> |
| <b>... understand why you need health screening?</b>                                                                                                 | <ul style="list-style-type: none"><li><input type="radio"/> Very easy</li><li><input type="radio"/> Fairly easy</li><li><input type="radio"/> Fairly difficult</li><li><input type="radio"/> Very difficult</li><li><input type="radio"/> No answer</li></ul> |
| <b>... judge if the information on health risks in the media is reliable?</b>                                                                        | <ul style="list-style-type: none"><li><input type="radio"/> Very easy</li><li><input type="radio"/> Fairly easy</li><li><input type="radio"/> Fairly difficult</li><li><input type="radio"/> Very difficult</li><li><input type="radio"/> No answer</li></ul> |
| <b>... decide how you can protect yourself from illness based on information in the media? (e.g. newspaper, brochures, internet, or other media)</b> | <ul style="list-style-type: none"><li><input type="radio"/> Very easy</li><li><input type="radio"/> Fairly easy</li><li><input type="radio"/> Fairly difficult</li><li><input type="radio"/> Very difficult</li><li><input type="radio"/> No answer</li></ul> |

|                                                                                                                           |                                                                                                                                                                                               |
|---------------------------------------------------------------------------------------------------------------------------|-----------------------------------------------------------------------------------------------------------------------------------------------------------------------------------------------|
| ... find out about activities that are good for your mental well-being? (e.g. drinking and eating habits, exercise, etc.) | <input type="radio"/> Very easy<br><input type="radio"/> Fairly easy<br><input type="radio"/> Fairly difficult<br><input type="radio"/> Very difficult<br><br><input type="radio"/> No answer |
| ... understand advice from family members or friends?                                                                     | <input type="radio"/> Very easy<br><input type="radio"/> Fairly easy<br><input type="radio"/> Fairly difficult<br><input type="radio"/> Very difficult<br><br><input type="radio"/> No answer |
| ... understand information in the media on how to get healthier?                                                          | <input type="radio"/> Very easy<br><input type="radio"/> Fairly easy<br><input type="radio"/> Fairly difficult<br><input type="radio"/> Very difficult<br><br><input type="radio"/> No answer |
| ... judge which everyday behavior is related to your health?                                                              | <input type="radio"/> Very easy<br><input type="radio"/> Fairly easy<br><input type="radio"/> Fairly difficult<br><input type="radio"/> Very difficult<br><br><input type="radio"/> No answer |

#### INFORMATION SOURCES ON ENVIRONMENTAL TOPICS

How often do you use the following sources to find out about environmental issues?

|                          |                                                                                                                                                                                                                                                            |
|--------------------------|------------------------------------------------------------------------------------------------------------------------------------------------------------------------------------------------------------------------------------------------------------|
| - School/university      | <input type="radio"/> Very frequently<br><input type="radio"/> Frequently<br><input type="radio"/> Occasionally<br><input type="radio"/> Rarely<br><input type="radio"/> Very rarely<br><input type="radio"/> Never<br><br><input type="radio"/> No answer |
| - Workplace/colleagues   | <input type="radio"/> Very frequently<br><input type="radio"/> Frequently<br><input type="radio"/> Occasionally<br><input type="radio"/> Rarely<br><input type="radio"/> Very rarely<br><input type="radio"/> Never<br><br><input type="radio"/> No answer |
| - Occupational physician | <input type="radio"/> Very frequently<br><input type="radio"/> Frequently<br><input type="radio"/> Occasionally<br><input type="radio"/> Rarely<br><input type="radio"/> Very rarely<br><input type="radio"/> Never<br><br><input type="radio"/> No answer |

|                                |                                                                                                                                                                                          |
|--------------------------------|------------------------------------------------------------------------------------------------------------------------------------------------------------------------------------------|
| <b>- Information brochures</b> | <ul style="list-style-type: none"><li>○ Very frequently</li><li>○ Frequently</li><li>○ Occasionally</li><li>○ Rarely</li><li>○ Very rarely</li><li>○ Never</li><li>○ No answer</li></ul> |
| <b>- Family/friends</b>        | <ul style="list-style-type: none"><li>○ Very frequently</li><li>○ Frequently</li><li>○ Occasionally</li><li>○ Rarely</li><li>○ Very rarely</li><li>○ Never</li><li>○ No answer</li></ul> |
| <b>- Family doctor</b>         | <ul style="list-style-type: none"><li>○ Very frequently</li><li>○ Frequently</li><li>○ Occasionally</li><li>○ Rarely</li><li>○ Very rarely</li><li>○ Never</li><li>○ No answer</li></ul> |
| <b>- Newspaper</b>             | <ul style="list-style-type: none"><li>○ Very frequently</li><li>○ Frequently</li><li>○ Occasionally</li><li>○ Rarely</li><li>○ Very rarely</li><li>○ Never</li><li>○ No answer</li></ul> |
| <b>- Commercials</b>           | <ul style="list-style-type: none"><li>○ Very frequently</li><li>○ Frequently</li><li>○ Occasionally</li><li>○ Rarely</li><li>○ Very rarely</li><li>○ Never</li><li>○ No answer</li></ul> |
| <b>- Internet</b>              | <ul style="list-style-type: none"><li>○ Very frequently</li><li>○ Frequently</li><li>○ Occasionally</li><li>○ Rarely</li><li>○ Very rarely</li><li>○ Never</li><li>○ No answer</li></ul> |

|        |                                                                                                                                                                                                                                                            |
|--------|------------------------------------------------------------------------------------------------------------------------------------------------------------------------------------------------------------------------------------------------------------|
| - Apps | <input type="radio"/> Very frequently<br><input type="radio"/> Frequently<br><input type="radio"/> Occasionally<br><input type="radio"/> Rarely<br><input type="radio"/> Very rarely<br><input type="radio"/> Never<br><br><input type="radio"/> No answer |
|--------|------------------------------------------------------------------------------------------------------------------------------------------------------------------------------------------------------------------------------------------------------------|

---

**Do you know and use apps relating to the environmental impacts listed?**

---

|          |                                                                                                                                                                                                                                                                                |
|----------|--------------------------------------------------------------------------------------------------------------------------------------------------------------------------------------------------------------------------------------------------------------------------------|
| - Pollen | <input type="radio"/> I know it and use it<br><input type="radio"/> I know it, but I don't use it<br><input type="radio"/> I don't know it, but would like to use it<br><input type="radio"/> I don't know it and do not want to use it<br><br><input type="radio"/> No answer |
|----------|--------------------------------------------------------------------------------------------------------------------------------------------------------------------------------------------------------------------------------------------------------------------------------|

|        |                                                                                                                                                                                                                                                                                |
|--------|--------------------------------------------------------------------------------------------------------------------------------------------------------------------------------------------------------------------------------------------------------------------------------|
| - Heat | <input type="radio"/> I know it and use it<br><input type="radio"/> I know it, but I don't use it<br><input type="radio"/> I don't know it, but would like to use it<br><input type="radio"/> I don't know it and do not want to use it<br><br><input type="radio"/> No answer |
|--------|--------------------------------------------------------------------------------------------------------------------------------------------------------------------------------------------------------------------------------------------------------------------------------|

|                |                                                                                                                                                                                                                                                                                |
|----------------|--------------------------------------------------------------------------------------------------------------------------------------------------------------------------------------------------------------------------------------------------------------------------------|
| - UV radiation | <input type="radio"/> I know it and use it<br><input type="radio"/> I know it, but I don't use it<br><input type="radio"/> I don't know it, but would like to use it<br><input type="radio"/> I don't know it and do not want to use it<br><br><input type="radio"/> No answer |
|----------------|--------------------------------------------------------------------------------------------------------------------------------------------------------------------------------------------------------------------------------------------------------------------------------|

|               |                                                                                                                                                                                                                                                                                |
|---------------|--------------------------------------------------------------------------------------------------------------------------------------------------------------------------------------------------------------------------------------------------------------------------------|
| - Air quality | <input type="radio"/> I know it and use it<br><input type="radio"/> I know it, but I don't use it<br><input type="radio"/> I don't know it, but would like to use it<br><input type="radio"/> I don't know it and do not want to use it<br><br><input type="radio"/> No answer |
|---------------|--------------------------------------------------------------------------------------------------------------------------------------------------------------------------------------------------------------------------------------------------------------------------------|

---

**ENVIRONMENTAL QUESTIONS**

---

|                                                             |                                                                                              |
|-------------------------------------------------------------|----------------------------------------------------------------------------------------------|
| Are there any environmental issues you are concerned about? | <input type="radio"/> Yes<br><input type="radio"/> No<br><br><input type="radio"/> No answer |
|-------------------------------------------------------------|----------------------------------------------------------------------------------------------|

|                                                                                                                |                                                                                                                                                                                                                                                                                                                                                                                                                   |
|----------------------------------------------------------------------------------------------------------------|-------------------------------------------------------------------------------------------------------------------------------------------------------------------------------------------------------------------------------------------------------------------------------------------------------------------------------------------------------------------------------------------------------------------|
| Please use this list to name the environmental issues that you are concerned about ( <i>multiple choice</i> ): | <input type="radio"/> Climate change<br><input type="radio"/> Increase in waste in the environment (plastic/microplastic/trash)<br><input type="radio"/> Loss of biodiversity<br><input type="radio"/> Anthropogenetic disasters<br><input type="radio"/> Pollution (air, water, soil)<br><input type="radio"/> Noise pollution<br><input type="radio"/> Natural disasters<br><br><input type="radio"/> No answer |
|----------------------------------------------------------------------------------------------------------------|-------------------------------------------------------------------------------------------------------------------------------------------------------------------------------------------------------------------------------------------------------------------------------------------------------------------------------------------------------------------------------------------------------------------|

---

---

**How much do you think pollution and environmental pollutants affect your health?**

- ☐ Very strong
  - ☐ Strong
  - ☐ Less strong
  - ☐ Not at all
  - ☐ I don't know
  
  - ☐ No answer
- 

**How well informed do you feel about the following topics?**

---

**- Heat**

- ☐ I know everything about it
  - ☐ I know a lot about it
  - ☐ I know little about it
  - ☐ I know nothing about it
  
  - ☐ No answer
- 

**- Storms and floods**

- ☐ I know everything about it
  - ☐ I know a lot about it
  - ☐ I know little about it
  - ☐ I know nothing about it
  
  - ☐ No answer
- 

**- UV radiation**

- ☐ I know everything about it
  - ☐ I know a lot about it
  - ☐ I know little about it
  - ☐ I know nothing about it
  
  - ☐ No answer
- 

**- Air pollution**

- ☐ I know everything about it
  - ☐ I know a lot about it
  - ☐ I know little about it
  - ☐ I know nothing about it
  
  - ☐ No answer
- 

#### **QUESTIONS ON AIR POLLUTION & PARTICULATE MATTER**

---

**How would you describe the air quality in general in your area?**

- ☐ Very good
  - ☐ Rather good
  - ☐ Rather bad
  - ☐ Very bad
  
  - ☐ No answer
- 

**How well informed do you feel about particulate matter**

- ☐ Very well informed
  - ☐ Well informed
  - ☐ Poorly informed
  - ☐ Very poorly informed
  
  - ☐ No answer
-

|                                                                                                 |                                                                                                                                                                                                                                                                           |
|-------------------------------------------------------------------------------------------------|---------------------------------------------------------------------------------------------------------------------------------------------------------------------------------------------------------------------------------------------------------------------------|
| <b>Have you heard about the term “UFP” or “ultrafine particles”?</b>                            | <ul style="list-style-type: none"><li><input type="radio"/> <b>Yes</b></li><li><input type="radio"/> <b>No</b></li><li><input type="radio"/> <b>No answer</b></li></ul>                                                                                                   |
| <b>Are you aware of protective measures in times of increased particulate matter pollution?</b> | <ul style="list-style-type: none"><li><input type="radio"/> Yes</li><li><input type="radio"/> No</li><li><input type="radio"/> No answer</li></ul>                                                                                                                        |
| <b>How do you behave in times of increased particulate matter pollution?</b>                    | <ul style="list-style-type: none"><li><input type="radio"/> Always</li><li><input type="radio"/> Often</li><li><input type="radio"/> Sometimes</li><li><input type="radio"/> Rarely</li><li><input type="radio"/> Never</li><li><input type="radio"/> No answer</li></ul> |
| <b>- I avoid physical activity outdoors, including sport</b>                                    | <ul style="list-style-type: none"><li><input type="radio"/> Always</li><li><input type="radio"/> Often</li><li><input type="radio"/> Sometimes</li><li><input type="radio"/> Rarely</li><li><input type="radio"/> Never</li><li><input type="radio"/> No answer</li></ul> |
| <b>- I keep the windows closed</b>                                                              | <ul style="list-style-type: none"><li><input type="radio"/> Always</li><li><input type="radio"/> Often</li><li><input type="radio"/> Sometimes</li><li><input type="radio"/> Rarely</li><li><input type="radio"/> Never</li><li><input type="radio"/> No answer</li></ul> |
| <b>- I reduce the amount of time I spend outdoors</b>                                           | <ul style="list-style-type: none"><li><input type="radio"/> Always</li><li><input type="radio"/> Often</li><li><input type="radio"/> Sometimes</li><li><input type="radio"/> Rarely</li><li><input type="radio"/> Never</li><li><input type="radio"/> No answer</li></ul> |
| <b>- I use medication to treat the symptoms</b>                                                 | <ul style="list-style-type: none"><li><input type="radio"/> Always</li><li><input type="radio"/> Often</li><li><input type="radio"/> Sometimes</li><li><input type="radio"/> Rarely</li><li><input type="radio"/> Never</li><li><input type="radio"/> No answer</li></ul> |
